# Supplementary material
Source: Springer Nature journal article supplement (https://www.springermedizin.de/resource/supplementary/12943_2012_1139_MOESM3_ESM.pdf/9552158)

**A**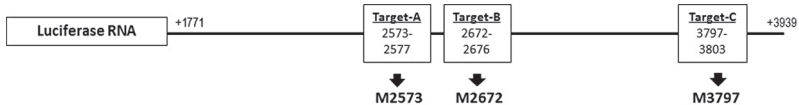**B**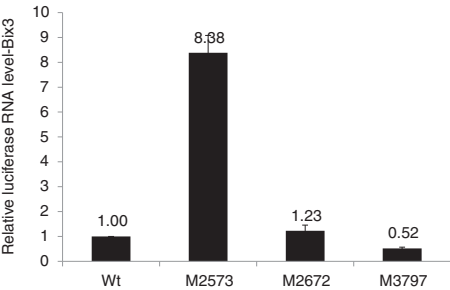**C**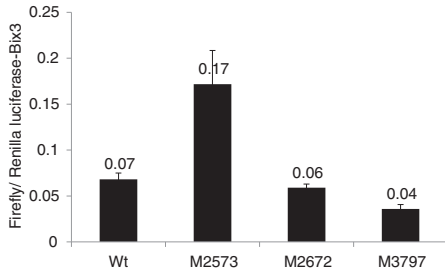

Supplement: MOESM3 [file 9552158]
